# Supplementary material for: Authentication of Greek PDO Kalamata Table Olives: A Novel Non-Target High Resolution Mass Spectrometric Approach
Source: PubMed Central journal article supplement (PMC7355929; doi:10.3390/molecules25122919), 2020-06-24
Supplement: molecules-25-02919-s001.pdf [file molecules-25-02919-s001.pdf]

SUPPLEMENTARY MATERIAL

## **Authentication of *Greek PDO Kalamata* table olives: a novel non-target HRMS approach**

**Natasa P. Kalogiouri, Reza Aalizadeh, Marilena Dasenaki and Nikolaos S. Thomaidis\***

Laboratory of Analytical Chemistry, Department of Chemistry, National and Kapodistrian University of Athens, Panepistimiopolis Zographou, 15771 Athens, Greece

\* Correspondence: ntho@chem.uoa.gr; Tel: +30 210 7274317; Fax: +30 210 7274750

Table S1. Target list of phenolic compounds.

| Compound Class | Compound                                       | Molecular formula                               | [M-H] <sup>-</sup> (m/z) | t <sub>R</sub> (min) | Fragments (m/z)                               | Fragment elemental formula                     |
|----------------|------------------------------------------------|-------------------------------------------------|--------------------------|----------------------|-----------------------------------------------|------------------------------------------------|
| flavonoids     | Apigenin                                       | C <sub>15</sub> H <sub>10</sub> O <sub>5</sub>  | 269.0455                 | 8.10                 | 117.0340                                      | C <sub>8</sub> H <sub>5</sub> O                |
|                |                                                |                                                 |                          |                      | 151.0031                                      | C <sub>7</sub> H <sub>3</sub> O <sub>4</sub>   |
|                | Epicatechin                                    | C <sub>15</sub> H <sub>14</sub> O <sub>6</sub>  | 289.0718                 | 4.30                 | 245.0819                                      | C <sub>14</sub> H <sub>13</sub> O <sub>4</sub> |
|                |                                                |                                                 |                          |                      | 123.0452                                      | C <sub>7</sub> H <sub>7</sub> O <sub>2</sub>   |
|                |                                                |                                                 |                          |                      | 203.0714                                      | C <sub>12</sub> H <sub>11</sub> O <sub>3</sub> |
|                |                                                |                                                 |                          |                      | 133.0295                                      | C <sub>8</sub> H <sub>5</sub> O <sub>2</sub>   |
| Luteolin       | C <sub>15</sub> H <sub>10</sub> O <sub>6</sub> | 285.0405                                        | 7.30                     | 151.0037             | C <sub>7</sub> H <sub>3</sub> O <sub>4</sub>  |                                                |
|                |                                                |                                                 |                          | 175.0401             | C <sub>10</sub> H <sub>7</sub> O <sub>3</sub> |                                                |
| phenolic acids | Caffeic acid                                   | C <sub>9</sub> H <sub>8</sub> O <sub>4</sub>    | 179.035                  | 1.40                 | 135.0446                                      | C <sub>8</sub> H <sub>7</sub> O <sub>2</sub>   |
|                |                                                |                                                 |                          |                      | 134.0346                                      | C <sub>8</sub> H <sub>6</sub> O <sub>2</sub>   |
|                | Ferulic acid                                   | C <sub>10</sub> H <sub>10</sub> O <sub>4</sub>  | 193.0506                 | 3.00                 | 134.0373                                      | C <sub>8</sub> H <sub>6</sub> O <sub>2</sub>   |
|                |                                                |                                                 |                          |                      | 178.0272                                      | C <sub>9</sub> H <sub>6</sub> O <sub>4</sub>   |
|                | Gallic acid                                    | C <sub>7</sub> H <sub>6</sub> O <sub>5</sub>    | 169.0142                 | 1.30                 | 125.0244                                      | C <sub>6</sub> H <sub>5</sub> O <sub>3</sub>   |
|                |                                                |                                                 |                          |                      | 69.0344                                       | C <sub>4</sub> H <sub>5</sub> O                |
|                |                                                |                                                 |                          |                      | 97.0295                                       | C <sub>5</sub> H <sub>5</sub> O <sub>2</sub>   |
|                | p-coumaric acid                                | C <sub>9</sub> H <sub>8</sub> O <sub>3</sub>    | 163.0401                 | 2.60                 | 119.0502                                      | C <sub>8</sub> H <sub>7</sub> O                |
|                |                                                |                                                 |                          |                      | 93.0344                                       | C <sub>6</sub> H <sub>5</sub> O                |
|                | Syringic acid                                  | C <sub>9</sub> H <sub>10</sub> O <sub>5</sub>   | 197.0455                 | 1.40                 | 123.008                                       | C <sub>6</sub> H <sub>3</sub> O <sub>3</sub>   |
|                |                                                |                                                 |                          |                      | 166.9976                                      | C <sub>7</sub> H <sub>3</sub> O <sub>5</sub>   |
|                | Homovanillic acid                              | C <sub>9</sub> H <sub>10</sub> O <sub>4</sub>   | 181.0491                 | 1.48                 | 122.0373                                      | C <sub>7</sub> H <sub>6</sub> O <sub>2</sub>   |
| 137.0608       |                                                |                                                 |                          |                      | C <sub>8</sub> H <sub>9</sub> O <sub>2</sub>  |                                                |
| 154.0272       |                                                |                                                 |                          |                      | C <sub>7</sub> H <sub>6</sub> O <sub>4</sub>  |                                                |
| Hydroxytyrosol | C <sub>8</sub> H <sub>10</sub> O <sub>3</sub>  | 153.0557                                        | 3.50                     | 123.0451             | C <sub>7</sub> H <sub>7</sub> O <sub>2</sub>  |                                                |
|                |                                                |                                                 |                          | 95.0502              | C <sub>6</sub> H <sub>7</sub> O               |                                                |
| Tyrosol        | C <sub>8</sub> H <sub>10</sub> O <sub>2</sub>  | 137.0608                                        | 4.10                     | 119.0495             | C <sub>8</sub> H <sub>7</sub> O               |                                                |
|                |                                                |                                                 |                          | 107.0496             | C <sub>7</sub> H <sub>7</sub> O               |                                                |
|                |                                                |                                                 |                          | 93.034               | C <sub>6</sub> H <sub>5</sub> O               |                                                |
| Vanillin       | C <sub>8</sub> H <sub>8</sub> O <sub>3</sub>   | 151.0401                                        | 4.70                     | 136.0158             | C <sub>7</sub> H <sub>4</sub> O <sub>3</sub>  |                                                |
|                |                                                |                                                 |                          | 108.0217             | C <sub>6</sub> H <sub>4</sub> O <sub>2</sub>  |                                                |
|                |                                                |                                                 |                          | 92.0268              | C <sub>6</sub> H <sub>4</sub> O               |                                                |
| lignans        | Pinoresinol                                    | C <sub>20</sub> H <sub>22</sub> O <sub>6</sub>  | 357.1344                 | 6.49                 | 151.0401                                      | C <sub>8</sub> H <sub>7</sub> O <sub>3</sub>   |
|                |                                                |                                                 |                          |                      | 136.0166                                      | C <sub>7</sub> H <sub>4</sub> O <sub>3</sub>   |
| secoridoids    | Oleuropein                                     | C <sub>25</sub> H <sub>32</sub> O <sub>13</sub> | 539.1722                 | 5.96                 | 89.0244                                       | C <sub>3</sub> H <sub>5</sub> O <sub>3</sub>   |
|                |                                                |                                                 |                          |                      | 275.0925                                      | C <sub>15</sub> H <sub>15</sub> O <sub>5</sub> |
|                |                                                |                                                 |                          |                      | 307.0823                                      | C <sub>15</sub> H <sub>15</sub> O <sub>7</sub> |

|                |                                                |          |      |          |                                              |
|----------------|------------------------------------------------|----------|------|----------|----------------------------------------------|
| Myricetin (IS) | C <sub>15</sub> H <sub>10</sub> O <sub>8</sub> | 317.0303 | 6.10 | 151.0031 | C <sub>7</sub> H <sub>3</sub> O <sub>4</sub> |
|                |                                                |          |      | 178.998  | C <sub>8</sub> H <sub>3</sub> O <sub>5</sub> |

Table S2. Evaluation of scaling methods used by PLS-DA model.

| Method              | R <sup>2</sup> X | R <sup>2</sup> Y | Q <sup>2</sup> | RMSEE  | RMSEP  | Classification Total Accuracy |          |                  | Score        |
|---------------------|------------------|------------------|----------------|--------|--------|-------------------------------|----------|------------------|--------------|
|                     |                  |                  |                |        |        | Train set                     | Test set | Cross validation |              |
| Mean Centering      | 0.867            | 0.971            | 0.966          | 0.0711 | 0.0921 | 1.00                          | 1.00     | 1.00             | 0.931        |
| Autoscaling         | 0.676            | 0.988            | 0.979          | 0.0528 | 0.0830 | 1.00                          | 1.00     | 1.00             | 0.913        |
| Range scaling       | 0.739            | 0.991            | 0.984          | 0.0466 | 0.0805 | 1.00                          | 1.00     | 1.00             | 0.925        |
| Pareto scaling      | 0.815            | 0.981            | 0.975          | 0.0674 | 0.0745 | 1.00                          | 1.00     | 1.00             | <b>0.932</b> |
| Vast                | 0.555            | 0.987            | 0.955          | 0.0563 | 0.0992 | 1.00                          | 1.00     | 1.00             | 0.884        |
| Level               | 0.736            | 0.989            | 0.976          | 0.0519 | 0.0776 | 1.00                          | 1.00     | 1.00             | 0.923        |
| Mean Centering Log2 | 0.972            | 0.978            | 0.971          | 0.0727 | 0.4880 | 1.00                          | 0.215    | 0.831            | 0.810        |
| VSN                 | 0.931            | 0.034            | 0.0360         | 0.4701 | 0.5020 | 0.412                         | 0.215    | 0.369            | 0.397        |
| PQN                 | 0.922            | 0.942            | 0.914          | 0.0745 | 0.0859 | 1.00                          | 1.00     | 1.00             | 0.925        |

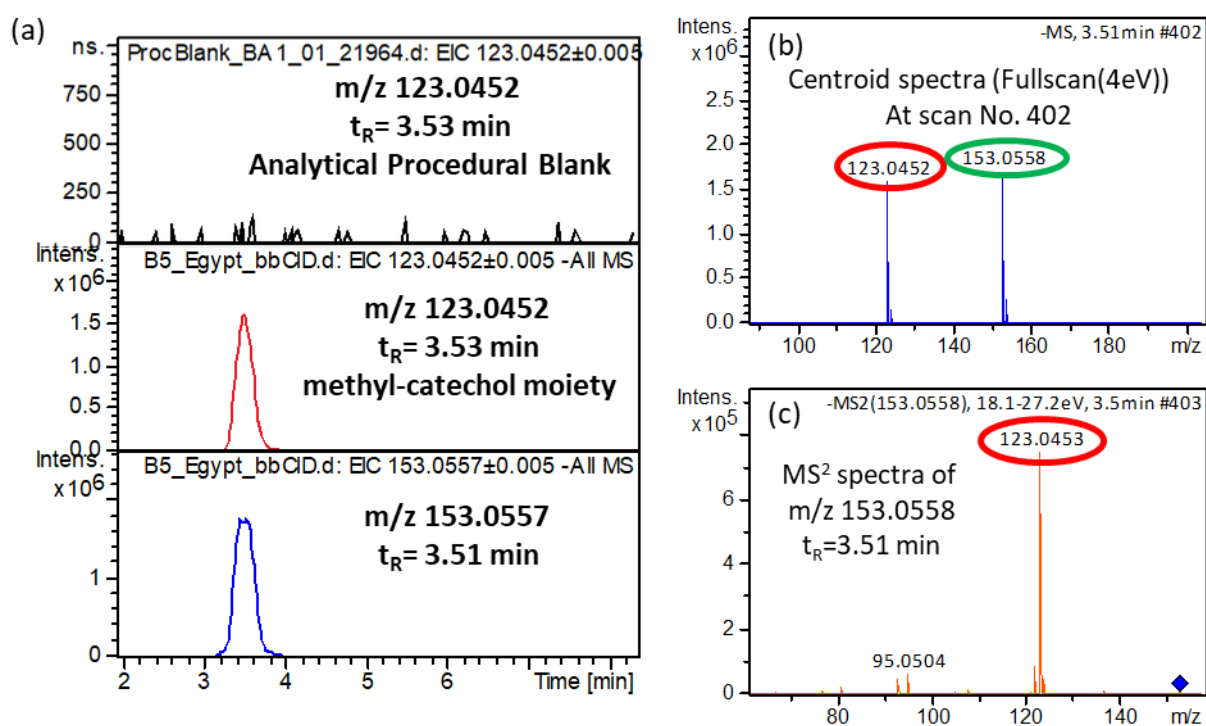

**Figure S1.** (a) EIC Chromatograms of the two mass features ( $\pm 5$  mDa); (b) Centroid mode spectra for the  $t_R$  of 3.53 min; (c) MS/MS spectra of hydroxytyrosol ( $m/z$  153.0558) eluting as same retention time as  $m/z$  123.0452.
